# Supplementary material for: Localized high concentration electrolyte behavior near a lithium–metal anode surface
Source: Royal Society of Chemistry journal article supplement (doi:10.1039/c9ta08935g), 2019-01-01
Supplement: c9ta08935g1.pdf [file c9ta08935g1.pdf]

Supporting Information for:

**Localized High Concentration Electrolyte Behavior Near a Lithium-Metal Anode Surface**

Yu Zheng<sup>1,3</sup>, Fernando A. Soto<sup>1</sup>, Victor Ponce<sup>1,2</sup>, Jorge M. Seminario<sup>1,2,4</sup>, Xia Cao<sup>5</sup>, Ji-Guang Zhang<sup>5</sup>,  
and Perla B. Balbuena<sup>1,2,3,\*</sup>

<sup>1</sup>Department of Chemical Engineering, <sup>2</sup>Department of Materials Science and Engineering, and  
<sup>3</sup>Department of Chemistry, <sup>4</sup>Department of Electrical Engineering, Texas A&M University, College  
Station, Texas 77843, United States; <sup>5</sup>Energy and Environment Directorate, Pacific Northwest National  
Laboratory, Richland, Washington 99354, United States

\*e-mail: balbuena@tamu.edu

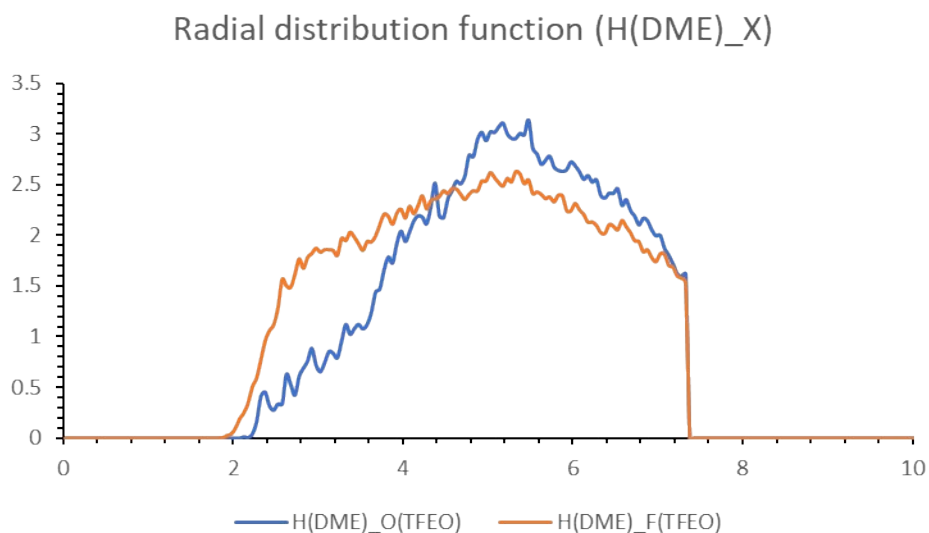

**Figure S1.** RDF profile for hydrogen atoms in DME and oxygen/fluorine atoms in TFEO obtained from AIMD simulations.

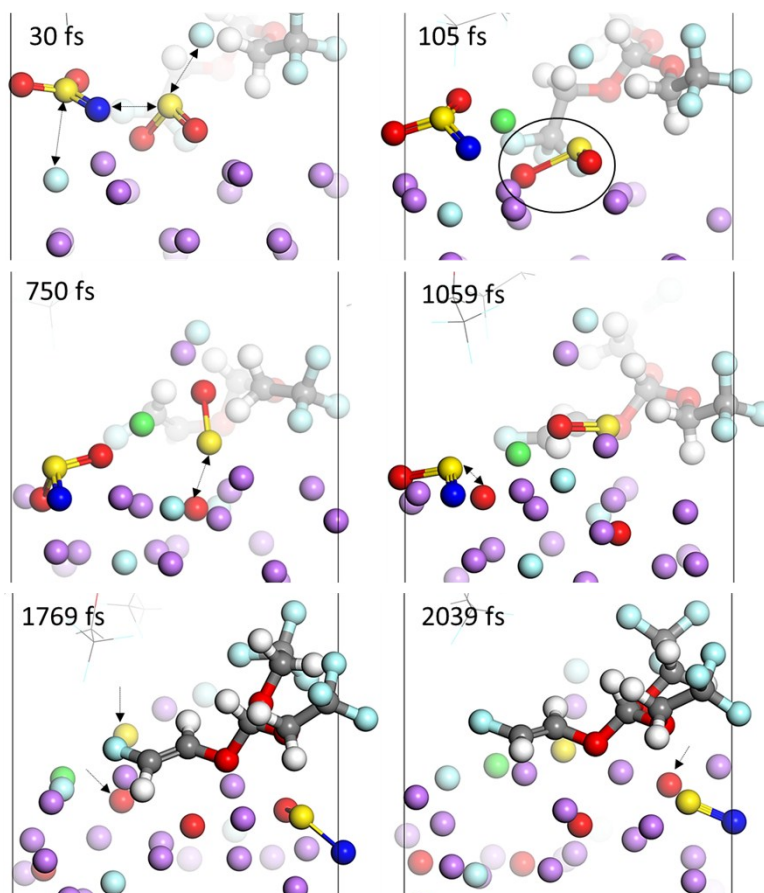

**Figure S2.** Reduction mechanism of the LiFSI salt in Configuration 1. Color code: lithium from the slab (salt), purple (green); oxygen, red; carbon, gray; fluorine, light blue; sulfur, yellow, nitrogen, blue; hydrogen, white.

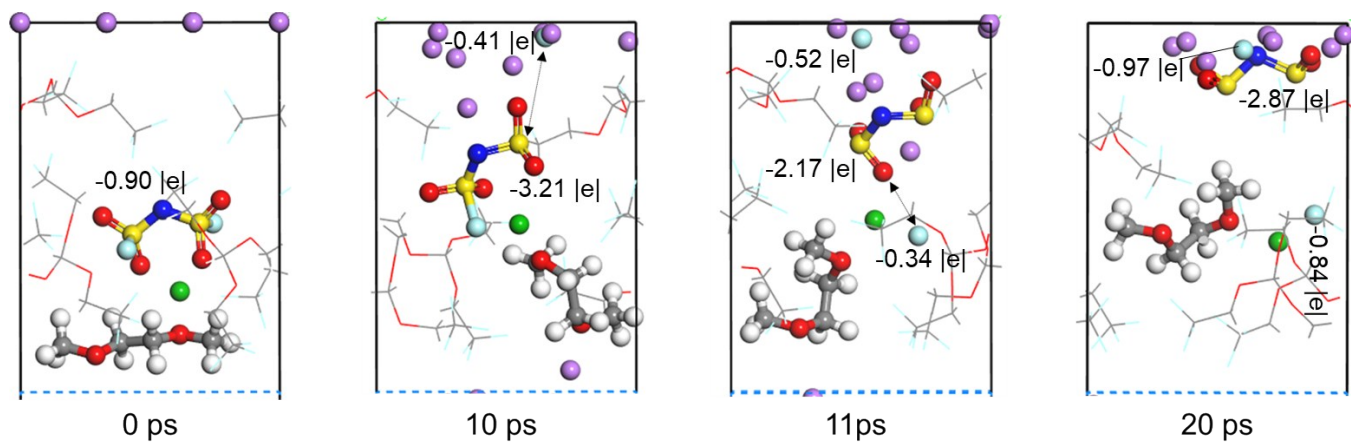

**Figure S3.** Reduction mechanism of the LiFSI salt in Configuration 2. Color code as in Figure S2.

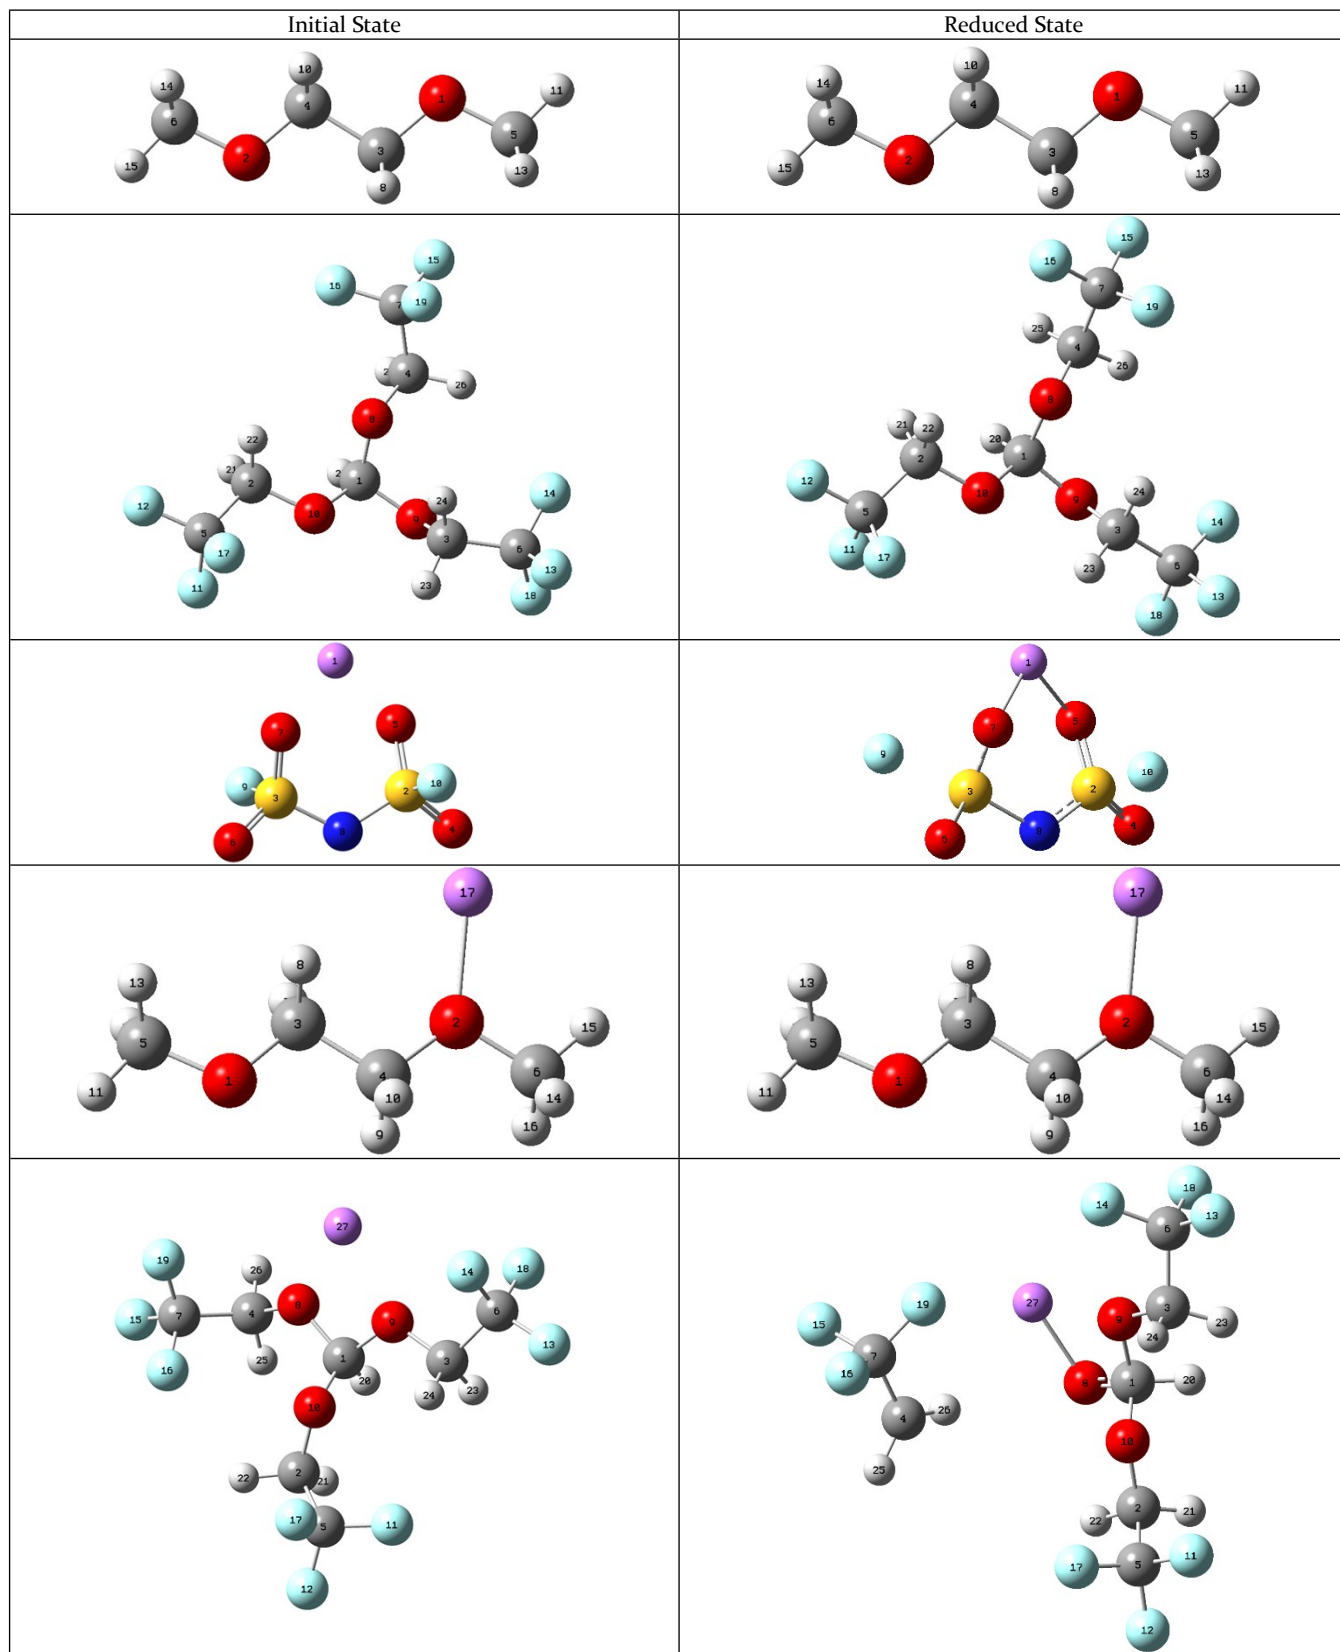

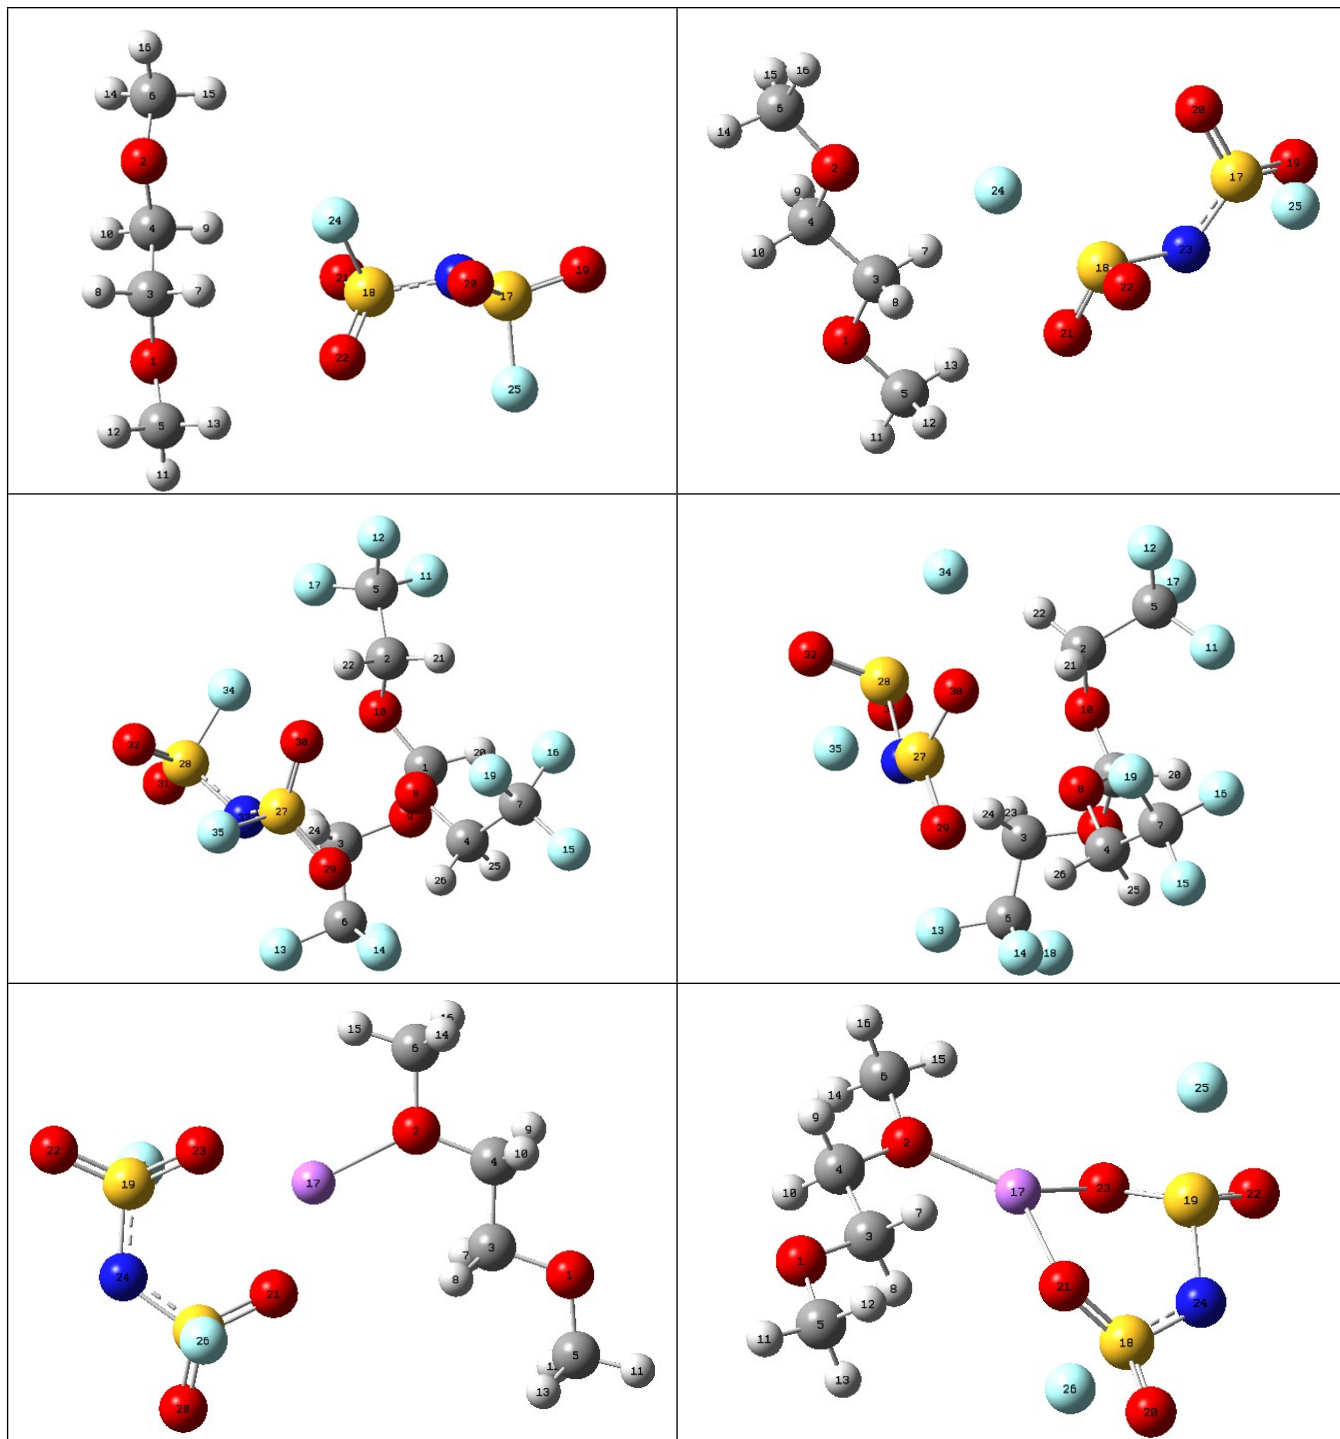

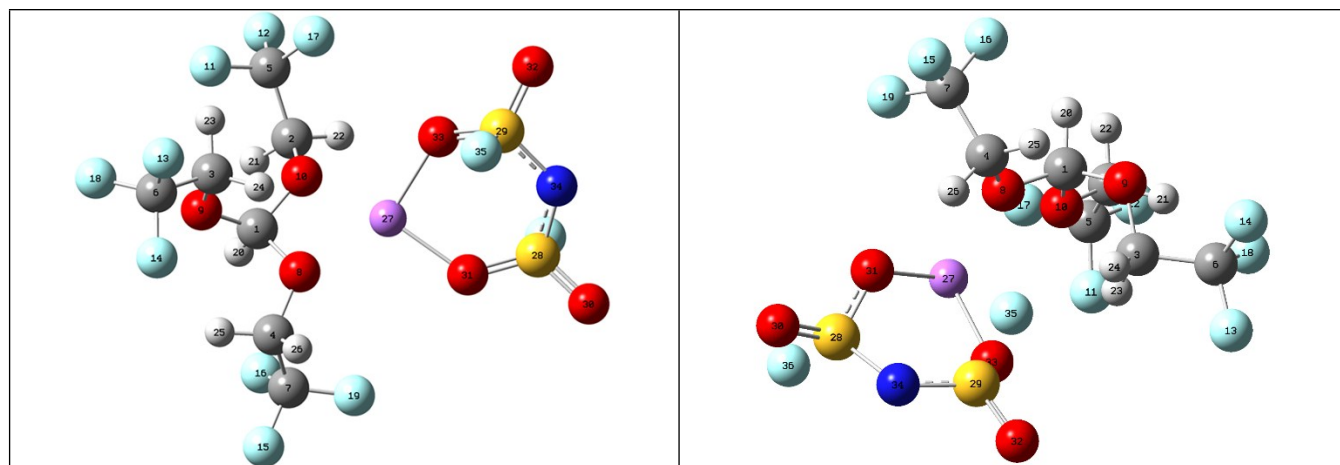

**Figure S4.** Initial and reduced state of each system listed in Table 2 (main text). Color code as in Figure S2.
